# Supplementary material for: Alternative Splicing of RAD6B and Not RAD6A Is Selectively Increased in Melanoma: Identification and Functional Characterization
Source: PubMed Central journal article supplement (PMC6912459; doi:10.3390/cells8111375), 2019-11-01
Supplement: cells-08-01375-s001.pdf [file cells-08-01375-s001.pdf]

## SUPPORTING INFORMATION

**Table 1.** Whole exome sequence analysis of Rad6A (UBE2A) transcripts in patient-derived melanoma xenografts. Data provided by Champions Oncology, Inc.

| Number | Tumor       | Stage | Sex    | Race      | Age | Gene  | Transcript ID                                                           |
|--------|-------------|-------|--------|-----------|-----|-------|-------------------------------------------------------------------------|
| 1      | Primary     | IV    | Male   | NA        | 56  | UBE2A | ENST00000371558: 82.83% ENST00000371569: 10.55%                         |
| 2      | Metastatic  | IV    | Male   | Caucasian | 89  | UBE2A | ENST00000371558: 75.45% ENST00000346330: 13.56%                         |
| 3      | Metastatic  | III   | Male   | Caucasian | 73  | UBE2A | ENST00000371558: 75.8% ENST00000346330: 22.48%                          |
| 4      | NA          | NA    | NA     | NA        | NA  | UBE2A | ENST00000371558: 87.67%                                                 |
| 5      | Metastatic  | III   | Female | Caucasian | 73  | UBE2A | ENST00000371558: 87.43%                                                 |
| 6      | Metastatic  | IV    | Male   | NA        | 71  | UBE2A | ENST00000371558: 75.46% ENST00000371569: 13.51%                         |
| 7      | Metastatic  | IV    | Male   | NA        | 56  | UBE2A | ENST00000371558: 78.58% ENST00000346330: 13.34%                         |
| 8      | Metastatic  | III   | Male   | Caucasian | 64  | UBE2A | ENST00000371558: 78.16%                                                 |
| 9      | Primary     | II    | Male   | Caucasian | 84  | UBE2A | ENST00000371558: 81.5% ENST00000346330: 15.64%                          |
| 10     | Metastatic  | IV    | Male   | NA        | 51  | UBE2A | ENST00000371558: 80.8%                                                  |
| 11     | Metastatic  | IV    | Male   | NA        | 74  | UBE2A | ENST00000371558: 70.51% ENST00000371569: 13.62% ENST00000346330: 11.33% |
| 12     | Metastatic  | IV    | Male   | NA        | 53  | UBE2A | ENST00000371558: 65.49% ENST00000469205: 17.08%                         |
| 13     | Metastatic  | II    | Male   | NA        | 50  | UBE2A | ENST00000371558: 90.44%                                                 |
| 14     | Metastatic  | III   | Male   | Caucasian | 63  | UBE2A | ENST00000371558: 85.61% ENST00000371569: 10.04%                         |
| 15     | NA          | NA    | NA     | NA        | NA  | UBE2A | ENST00000371558: 79.81% ENST00000346330: 14.49%                         |
| 16     | Primary     | IV    | Female | NA        | 61  | UBE2A | ENST00000371558: 82.92% ENST00000346330: 11.5%                          |
| 17     | Primary     | I     | Male   | Caucasian | 55  | UBE2A | ENST00000371558: 79.3% ENST00000371569: 10.6%                           |
| 18     | Metastatic  | IV    | Female | Caucasian | 35  | UBE2A | ENST00000371558: 88.46%                                                 |
| 19     | Metastatic  | IV    | Male   | Caucasian | 43  | UBE2A | ENST00000371558: 86.81% ENST00000346330: 11.99%                         |
| 20     | Primary     | III   | Male   | Caucasian | 40  | UBE2A | ENST00000371558: 91.78%                                                 |
| 21     | Metastatic  | III   | Male   | Caucasian | 76  | UBE2A | ENST00000371558: 85.96%                                                 |
| 22     | Metastatic  | IV    | Male   | Caucasian | 87  | UBE2A | ENST00000371558: 89.24%                                                 |
| 23     | Metastatic  | IV    | Male   | Caucasian | 68  | UBE2A | ENST00000371558: 77.26% ENST00000371569: 13.58%                         |
| 24     | Primary     | II    | Male   | NA        | 74  | UBE2A | ENST00000371558: 75.81% ENST00000371569: 16.22%                         |
| 25     | Primary     | IV    | Male   | NA        | 56  | UBE2A | ENST00000371558: 90.25%                                                 |
| 26     | Metastatic  | II    | Male   | Caucasian | 39  | UBE2A | ENST00000371558: 79.14% ENST00000346330: 19.62%                         |
| 27     | Primary     | II    | Male   | Caucasian | 87  | UBE2A | ENST00000371558: 75.52% ENST00000371569: 11.72%                         |
| 28     | Local Metas | IV    | Female | Caucasian | 56  | UBE2A | ENST00000371558: 77.96% ENST00000346330: 14.63%                         |
| 29     | Primary     | II    | Male   | Caucasian | 49  | UBE2A | ENST00000371558: 83.05% ENST00000371569: 12.58%                         |
| 30     | Primary     | IV    | Male   | Caucasian | 41  | UBE2A | ENST00000371558: 68.98% ENST00000371569: 20.16%                         |

ENST00000371558, wild-type Rad6A (UBE2A)

**Table 2.** Whole exome sequence analysis of Rad6B (UBE2B) transcripts in patient-derived melanoma xenografts. Data provided by Champions Oncology, Inc.

| Number | Tumor       | Stage | Sex    | Race      | Age | Gene  | Transcript ID                                                                                   |
|--------|-------------|-------|--------|-----------|-----|-------|-------------------------------------------------------------------------------------------------|
| 1      | Primary     | IV    | Male   | NA        | 56  | UBE2B | ENST00000499038: 66.2% ENST00000506787: 14.85%                                                  |
| 2      | Metastatic  | IV    | Male   | Caucasian | 89  | UBE2B | ENST00000499038: 49.58% ENST00000507277: 20.44% ENST00000265339: 11.17%                         |
| 3      | Metastatic  | III   | Male   | Caucasian | 73  | UBE2B | ENST00000507277: 49.97% ENST00000506787: 13.82% ENST00000265339: 11.26%                         |
| 4      | NA          | NA    | NA     | NA        | NA  | UBE2B | ENST00000499038: 49.16% ENST00000507277: 24.9% ENST00000265339: 14.04%                          |
| 5      | Metastatic  | III   | Female | Caucasian | 73  | UBE2B | ENST00000507277: 53.8% ENST00000506787: 20.5% ENST00000265339: 15.09%                           |
| 6      | Metastatic  | IV    | Male   | NA        | 71  | UBE2B | ENST00000499038: 40.67% ENST00000507277: 22.25% ENST00000506787: 16.86% ENST00000265339: 11.37% |
| 7      | Metastatic  | IV    | Male   | NA        | 56  | UBE2B | ENST00000507277: 46.91% ENST00000506787: 13.16% ENST00000265339: 12.6%                          |
| 8      | Metastatic  | III   | Male   | Caucasian | 64  | UBE2B | ENST00000499038: 39.04% ENST00000507277: 26.53% ENST00000506787: 14.26% ENST00000265339: 10.59% |
| 9      | Primary     | II    | Male   | Caucasian | 84  | UBE2B | ENST00000507277: 49.97% ENST00000506787: 13.82% ENST00000265339: 11.26%                         |
| 10     | Metastatic  | IV    | Male   | NA        | 51  | UBE2B | ENST00000499038: 43.41% ENST00000507277: 26.02% ENST00000506787: 10.7% ENST00000265339: 10.19%  |
| 11     | Metastatic  | IV    | Male   | NA        | 74  | UBE2B | ENST00000499038: 38.31% ENST00000507277: 24.8% ENST00000265339: 15.27% ENST00000506787: 13.79%  |
| 12     | Metastatic  | IV    | Male   | NA        | 53  | UBE2B | ENST00000499038: 46.74% ENST00000507277: 25.85%                                                 |
| 13     | Metastatic  | II    | Male   | NA        | 50  | UBE2B | ENST00000507277: 55.04% ENST00000506787: 14.5% ENST00000265339: 11.86% ENST00000499038: 10.88%  |
| 14     | Metastatic  | III   | Male   | Caucasian | 63  | UBE2B | ENST00000499038: 42.83% ENST00000507277: 24.37% ENST00000265339: 15.07% ENST00000506787: 11.78% |
| 15     | NA          | NA    | NA     | NA        | NA  | UBE2B | ENST00000507277: 42.74% ENST00000265339: 21.21% ENST00000503080: 17.02% ENST00000499038: 10.23% |
| 16     | Primary     | IV    | Female | NA        | 61  | UBE2B | ENST00000507277: 56.84% ENST00000506787: 20.5% ENST00000265339: 12.73%                          |
| 17     | Primary     | I     | Male   | Caucasian | 55  | UBE2B | ENST00000499038: 41.44% ENST00000507277: 23.68% ENST00000265339: 18.58%                         |
| 18     | Metastatic  | IV    | Female | Caucasian | 35  | UBE2B | ENST00000507277: 49.37% ENST00000499038: 36.36% ENST00000265339: 14.16%                         |
| 19     | Metastatic  | IV    | Male   | Caucasian | 43  | UBE2B | ENST00000507277: 45.05% ENST00000265339: 20.75% ENST00000503080: 14.7% ENST00000499038: 11.62%  |
| 20     | Primary     | III   | Male   | Caucasian | 40  | UBE2B | ENST00000499038: 58.27% ENST00000507277: 15.19% ENST00000265339: 10.35% ENST00000506787: 10.16% |
| 21     | Metastatic  | III   | Male   | Caucasian | 76  | UBE2B | ENST00000499038: 47.2% ENST00000507277: 24.3% ENST00000265339: 13.93%                           |
| 22     | Metastatic  | IV    | Male   | Caucasian | 87  | UBE2B | ENST00000507277: 55.83% ENST00000265339: 19.37% ENST00000506787: 12.65%                         |
| 23     | Metastatic  | IV    | Male   | Caucasian | 68  | UBE2B | ENST00000499038: 43.24% ENST00000507277: 22.25% ENST00000506787: 15.65%                         |
| 24     | Primary     | II    | Male   | NA        | 74  | UBE2B | ENST00000499038: 40.05% ENST00000507277: 24.6% ENST00000506787: 14.51% ENST00000265339: 12.58%  |
| 25     | Primary     | IV    | Male   | NA        | 56  | UBE2B | ENST00000499038: 48.37% ENST00000507277: 20.3% ENST00000265339: 12.35% ENST00000506787: 11.33%  |
| 26     | Metastatic  | II    | Male   | Caucasian | 39  | UBE2B | ENST00000507277: 53.09% ENST00000265339: 15.01% ENST00000506787: 14.84%                         |
| 27     | Primary     | II    | Male   | Caucasian | 87  | UBE2B | ENST00000499038: 38.24% ENST00000265339: 21.85% ENST00000507277: 19.09%                         |
| 28     | Local Metas | IV    | Female | Caucasian | 56  | UBE2B | ENST00000507277: 50.06% ENST00000503080: 17.09% ENST00000265339: 14.56%                         |
| 29     | Primary     | II    | Male   | Caucasian | 49  | UBE2B | ENST00000499038: 53.78% ENST00000507277: 20.22% ENST00000265339: 11.91%                         |
| 30     | Primary     | IV    | Male   | Caucasian | 41  | UBE2B | ENST00000499038: 40.95% ENST00000507277: 23.55% ENST00000506787: 13.38% ENST00000265339: 11.71% |

ENST00000265339, wild type Rad6B (UBE2B)
